# Supplementary material
Source: publisher figshare collection journal article supplement (https://springernature.figshare.com/ndownloader/files/14962634)
Supplement: Supplementary file 1 [file 14962634]

## Sheet: Sheet1
		1% Ru-Co	2% Ru-Co	3% Ru-Co
	20	130.556	1522	1160
	20.05	125	1515	1176
	20.1	125.556	1476	1149
	20.15	126.667	1495	1239
	20.2	126.111	1483	1223
	20.25	134.444	1559	1164
	20.3	127.778	1455	1193
	20.35	134.444	1559	1213
	20.4	121.667	1545	1125
	20.45	112.222	1436	1166
	20.5	121.667	1465	1262
	20.55	129.444	1474	1158
	20.6	126.667	1432	1166
	20.65	132.222	1444	1192
	20.7	140.556	1474	1232
	20.75	128.889	1495	1185
	20.8	125	1511	1222
	20.85	140.556	1536	1209
	20.9	129.444	1489	1239
	20.95	137.778	1547	1212
	21	127.778	1485	1267
	21.05	145	1544	1227
	21.1	131.111	1544	1154
	21.15	134.444	1485	1164
	21.2	132.778	1493	1100
	21.25	130.556	1499	1207
	21.3	130.556	1612	1178
	21.35	123.889	1486	1207
	21.4	133.889	1486	1238
	21.45	123.333	1456	1190
	21.5	143.889	1546	1236
	21.55	127.222	1495	1167
	21.6	128.333	1498	1206
	21.65	135.556	1496	1236
	21.7	128.889	1496	1229
	21.75	121.111	1460	1190
	21.8	125.556	1461	1220
	21.85	132.778	1467	1198
	21.9	133.889	1505	1207
	21.95	145.556	1516	1214
	22	136.111	1543	1187
	22.05	148.889	1595	1193
	22.1	136.667	1460	1197
	22.15	138.889	1505	1134
	22.2	144.444	1503	1173
	22.25	138.333	1526	1238
	22.3	131.111	1518	1198
	22.35	138.889	1532	1248
	22.4	135.556	1513	1246
	22.45	138.333	1544	1216
	22.5	135.556	1532	1234
	22.55	133.333	1508	1233
	22.6	150.556	1529	1190
	22.65	132.222	1477	1139
	22.7	126.111	1485	1204
	22.75	135	1545	1178
	22.8	127.222	1518	1188
	22.85	141.111	1486	1223
	22.9	151.667	1515	1266
	22.95	144.444	1517	1195
	23	131.111	1525	1190
	23.05	139.444	1540	1202
	23.1	140.556	1541	1195
	23.15	145	1526	1248
	23.2	141.111	1516	1202
	23.25	147.222	1559	1156
	23.3	136.667	1468	1160
	23.35	140.556	1530	1196
	23.4	142.778	1538	1198
	23.45	149.444	1496	1196
	23.5	130.556	1508	1224
	23.55	142.778	1522	1191
	23.6	129.444	1486	1243
	23.65	141.111	1526	1201
	23.7	136.111	1531	1220
	23.75	134.444	1488	1265
	23.8	141.111	1507	1240
	23.85	138.889	1535	1229
	23.9	134.444	1586	1205
	23.95	134.444	1512	1224
	24	123.333	1485	1140
	24.05	153.889	1433	1237
	24.1	137.778	1496	1212
	24.15	172.778	1484	1154
	24.2	143.333	1516	1261
	24.25	142.778	1539	1227
	24.3	141.111	1509	1230
	24.35	135.556	1634	1259
	24.4	148.889	1566	1226
	24.45	146.111	1537	1242
	24.5	129.444	1556	1131
	24.55	145.556	1489	1220
	24.6	146.667	1576	1262
	24.65	142.222	1516	1238
	24.7	149.444	1576	1234
	24.75	151.111	1529	1206
	24.8	142.778	1595	1136
	24.85	138.889	1491	1159
	24.9	138.889	1582	1191
	24.95	140.556	1509	1242
	25	134.444	1509	1181
	25.05	133.889	1556	1199
	25.1	151.667	1564	1165
	25.15	147.222	1495	1216
	25.2	140	1574	1232
	25.25	148.333	1576	1219
	25.3	142.778	1513	1137
	25.35	137.222	1508	1134
	25.4	147.778	1509	1223
	25.45	140	1562	1230
	25.5	143.889	1543	1201
	25.55	140	1485	1244
	25.6	138.889	1532	1193
	25.65	145.556	1524	1199
	25.7	146.111	1553	1213
	25.75	138.889	1499	1201
	25.8	142.222	1588	1184
	25.85	143.889	1471	1252
	25.9	142.778	1531	1229
	25.95	151.111	1503	1212
	26	136.667	1541	1207
	26.05	146.667	1488	1187
	26.1	139.444	1568	1177
	26.15	143.333	1518	1221
	26.2	144.444	1513	1209
	26.25	141.111	1542	1189
	26.3	137.222	1525	1224
	26.35	154.444	1518	1246
	26.4	150	1469	1278
	26.45	149.444	1533	1246
	26.5	140	1515	1221
	26.55	147.222	1626	1193
	26.6	136.667	1498	1251
	26.65	139.444	1538	1221
	26.7	152.222	1554	1263
	26.75	138.333	1494	1223
	26.8	154.444	1614	1200
	26.85	142.222	1592	1217
	26.9	149.444	1593	1204
	26.95	147.222	1628	1225
	27	149.444	1584	1206
	27.05	157.778	1559	1217
	27.1	132.222	1533	1174
	27.15	150.556	1503	1231
	27.2	143.333	1555	1195
	27.25	165	1584	1237
	27.3	147.222	1551	1255
	27.35	146.667	1506	1184
	27.4	153.333	1593	1247
	27.45	149.444	1544	1193
	27.5	160	1553	1247
	27.55	153.889	1566	1208
	27.6	137.222	1524	1205
	27.65	146.111	1601	1152
	27.7	147.778	1529	1244
	27.75	144.444	1518	1168
	27.8	138.889	1595	1190
	27.85	148.333	1502	1196
	27.9	145.556	1514	1132
	27.95	166.111	1573	1209
	28	152.222	1517	1253
	28.05	162.222	1534	1201
	28.1	150.556	1568	1208
	28.15	152.778	1492	1211
	28.2	147.778	1543	1219
	28.25	167.222	1577	1173
	28.3	132.222	1690	1201
	28.35	157.778	1581	1241
	28.4	153.333	1554	1228
	28.45	155	1623	1240
	28.5	141.667	1632	1193
	28.55	150	1596	1267
	28.6	167.222	1493	1265
	28.65	138.889	1570	1260
	28.7	162.778	1586	1176
	28.75	145.556	1506	1207
	28.8	146.667	1472	1208
	28.85	159.444	1604	1268
	28.9	147.222	1567	1235
	28.95	143.333	1582	1236
	29	155	1511	1182
	29.05	163.333	1582	1206
	29.1	133.889	1637	1206
	29.15	160	1562	1180
	29.2	150.556	1516	1217
	29.25	152.222	1563	1218
	29.3	140.556	1583	1194
	29.35	158.889	1553	1190
	29.4	158.333	1546	1203
	29.45	144.444	1540	1200
	29.5	140.556	1593	1215
	29.55	157.222	1593	1190
	29.6	140.556	1574	1213
	29.65	147.222	1514	1238
	29.7	162.222	1571	1197
	29.75	151.111	1543	1267
	29.8	141.667	1537	1197
	29.85	165.556	1540	1200
	29.9	168.333	1587	1210
	29.95	155.556	1603	1180
	30	160.556	1637	1171
	30.05	160.556	1541	1182
	30.1	151.667	1600	1184
	30.15	162.222	1593	1177
	30.2	164.444	1610	1198
	30.25	167.222	1552	1181
	30.3	164.444	1542	1234
	30.35	167.222	1635	1253
	30.4	155.556	1572	1265
	30.45	165.556	1578	1162
	30.5	165.556	1603	1194
	30.55	165	1603	1197
	30.6	165.556	1577	1228
	30.65	143.889	1550	1216
	30.7	153.333	1539	1259
	30.75	153.889	1575	1231
	30.8	162.778	1614	1214
	30.85	137.778	1578	1178
	30.9	181.667	1569	1237
	30.95	153.333	1626	1209
	31	150.556	1563	1218
	31.05	157.778	1585	1230
	31.1	161.111	1557	1224
	31.15	158.889	1558	1290
	31.2	172.778	1590	1341
	31.25	151.111	1614	1253
	31.3	161.667	1590	1380
	31.35	161.667	1607	1416
	31.4	160.556	1579	1315
	31.45	163.333	1605	1277
	31.5	162.778	1581	1359
	31.55	148.333	1583	1303
	31.6	166.667	1640	1220
	31.65	168.889	1580	1211
	31.7	156.111	1537	1256
	31.75	166.667	1590	1240
	31.8	150.556	1625	1255
	31.85	163.333	1571	1279
	31.9	153.889	1530	1139
	31.95	155.556	1468	1219
	32	165	1577	1217
	32.05	152.222	1607	1251
	32.1	167.778	1606	1182
	32.15	159.444	1576	1218
	32.2	163.333	1573	1215
	32.25	145	1533	1272
	32.3	171.667	1529	1205
	32.35	160.556	1546	1212
	32.4	153.889	1565	1270
	32.45	152.222	1567	1232
	32.5	166.111	1609	1188
	32.55	161.111	1602	1174
	32.6	175	1599	1300
	32.65	165.556	1576	1226
	32.7	140	1572	1229
	32.75	170	1528	1276
	32.8	170	1591	1179
	32.85	151.667	1557	1254
	32.9	165.556	1600	1169
	32.95	163.333	1546	1224
	33	155.556	1574	1253
	33.05	170.556	1527	1219
	33.1	156.111	1617	1195
	33.15	160	1582	1260
	33.2	159.444	1566	1145
	33.25	163.333	1569	1185
	33.3	158.333	1559	1231
	33.35	161.667	1583	1264
	33.4	165.556	1448	1243
	33.45	147.222	1608	1285
	33.5	158.889	1632	1312
	33.55	175	1502	1236
	33.6	160.556	1621	1266
	33.65	159.444	1582	1255
	33.7	167.222	1618	1297
	33.75	164.444	1600	1291
	33.8	160.556	1625	1310
	33.85	162.778	1541	1285
	33.9	153.889	1546	1195
	33.95	196.111	1567	1148
	34	170	1565	1276
	34.05	179.444	1579	1229
	34.1	178.333	1576	1196
	34.15	177.222	1528	1205
	34.2	177.778	1608	1203
	34.25	157.778	1599	1259
	34.3	160.556	1589	1205
	34.35	168.333	1557	1187
	34.4	178.333	1617	1269
	34.45	165	1582	1276
	34.5	156.111	1575	1218
	34.55	172.222	1594	1261
	34.6	148.333	1617	1238
	34.65	178.889	1539	1186
	34.7	175	1542	1229
	34.75	171.667	1523	1287
	34.8	155.556	1570	1220
	34.85	153.889	1600	1263
	34.9	171.111	1553	1285
	34.95	155	1571	1223
	35	160	1559	1181
	35.05	178.889	1585	1254
	35.1	165	1560	1170
	35.15	160	1590	1234
	35.2	174.444	1566	1292
	35.25	170.556	1571	1260
	35.3	176.667	1626	1194
	35.35	159.444	1536	1279
	35.4	172.222	1576	1290
	35.45	177.222	1542	1292
	35.5	163.333	1601	1259
	35.55	170	1526	1231
	35.6	180	1634	1253
	35.65	163.333	1623	1281
	35.7	172.222	1577	1193
	35.75	177.222	1623	1301
	35.8	172.778	1608	1225
	35.85	163.333	1657	1302
	35.9	156.111	1634	1260
	35.95	176.111	1683	1273
	36	163.333	1616	1278
	36.05	176.667	1665	1288
	36.1	163.889	1730	1209
	36.15	157.778	1723	1279
	36.2	170.556	1679	1342
	36.25	181.111	1759	1259
	36.3	162.222	1685	1278
	36.35	176.111	1710	1276
	36.4	160.556	1823	1253
	36.45	183.333	1692	1321
	36.5	177.222	1723	1281
	36.55	184.444	1887	1276
	36.6	173.333	1871	1366
	36.65	168.889	1852	1391
	36.7	177.222	1846	1392
	36.75	166.667	1768	1440
	36.8	175	1785	1466
	36.85	167.778	1808	1536
	36.9	174.444	1808	1642
	36.95	175.556	1813	1642
	37	159.444	1679	1681
	37.05	171.667	1646	1715
	37.1	170	1682	1476
	37.15	158.889	1754	1447
	37.2	173.889	1729	1374
	37.25	182.222	1608	1343
	37.3	154.444	1625	1287
	37.35	191.111	1571	1289
	37.4	171.667	1562	1303
	37.45	169.444	1616	1281
	37.5	180	1603	1301
	37.55	177.778	1611	1312
	37.6	176.667	1631	1281
	37.65	165.556	1588	1247
	37.7	177.222	1693	1294
	37.75	177.222	1657	1303
	37.8	176.667	1682	1321
	37.85	174.444	1672	1269
	37.9	180	1618	1313
	37.95	147.222	1647	1266
	38	172.778	1673	1231
	38.05	171.667	1610	1260
	38.1	165	1650	1211
	38.15	163.333	1637	1276
	38.2	160.556	1634	1273
	38.25	172.222	1619	1262
	38.3	172.778	1603	1278
	38.35	177.778	1648	1282
	38.4	173.333	1625	1253
	38.45	172.778	1568	1260
	38.5	184.444	1586	1317
	38.55	173.333	1657	1292
	38.6	169.444	1691	1318
	38.65	197.778	1621	1332
	38.7	178.333	1657	1272
	38.75	181.667	1567	1318
	38.8	178.889	1563	1266
	38.85	171.667	1597	1321
	38.9	177.778	1585	1298
	38.95	173.889	1587	1281
	39	173.333	1536	1281
	39.05	172.778	1620	1297
	39.1	189.444	1659	1272
	39.15	182.222	1550	1231
	39.2	166.111	1563	1284
	39.25	177.778	1677	1303
	39.3	178.889	1648	1277
	39.35	182.778	1627	1298
	39.4	182.222	1599	1211
	39.45	188.889	1576	1326
	39.5	167.778	1514	1260
	39.55	182.778	1631	1203
	39.6	179.444	1567	1237
	39.65	178.889	1565	1217
	39.7	186.111	1590	1228
	39.75	183.889	1549	1307
	39.8	188.889	1614	1219
	39.85	189.444	1549	1250
	39.9	192.778	1583	1321
	39.95	178.333	1589	1288
	40	189.444	1630	1265
	40.05	195.556	1602	1246
	40.1	175	1646	1197
	40.15	168.333	1569	1269
	40.2	179.444	1603	1263
	40.25	182.778	1557	1267
	40.3	178.889	1644	1230
	40.35	189.444	1574	1219
	40.4	173.333	1559	1325
	40.45	182.222	1581	1276
	40.5	184.444	1615	1239
	40.55	194.444	1580	1225
	40.6	196.667	1628	1260
	40.65	190.556	1539	1214
	40.7	178.889	1607	1295
	40.75	176.111	1674	1315
	40.8	202.222	1653	1240
	40.85	180	1597	1316
	40.9	186.111	1601	1273
	40.95	179.444	1545	1252
	41	187.778	1606	1386
	41.05	203.889	1587	1231
	41.1	181.111	1557	1245
	41.15	168.889	1684	1246
	41.2	186.667	1570	1294
	41.25	184.444	1571	1290
	41.3	182.778	1559	1290
	41.35	188.889	1601	1272
	41.4	177.222	1550	1322
	41.45	192.222	1675	1280
	41.5	186.111	1651	1264
	41.55	192.222	1634	1268
	41.6	178.333	1550	1247
	41.65	191.111	1659	1298
	41.7	183.889	1639	1279
	41.75	190.556	1624	1293
	41.8	196.667	1566	1268
	41.85	196.111	1595	1335
	41.9	183.333	1615	1233
	41.95	202.222	1620	1290
	42	182.778	1616	1303
	42.05	187.778	1627	1249
	42.1	192.778	1696	1274
	42.15	201.111	1707	1279
	42.2	197.222	1607	1260
	42.25	189.444	1696	1305
	42.3	193.889	1711	1356
	42.35	203.889	1790	1320
	42.4	168.889	1790	1301
	42.45	196.111	1754	1271
	42.5	191.667	1779	1271
	42.55	188.889	1791	1325
	42.6	180	1789	1282
	42.65	180.556	1771	1347
	42.7	163.889	1752	1315
	42.75	173.889	1728	1334
	42.8	167.222	1634	1254
	42.85	186.111	1685	1322
	42.9	191.667	1684	1346
	42.95	179.444	1680	1288
	43	208.889	1682	1225
	43.05	190	1634	1296
	43.1	200	1687	1246
	43.15	186.667	1663	1274
	43.2	187.222	1628	1249
	43.25	195	1563	1277
	43.3	183.889	1688	1328
	43.35	178.889	1652	1304
	43.4	200.556	1615	1258
	43.45	191.667	1621	1288
	43.5	205.556	1613	1289
	43.55	193.333	1647	1263
	43.6	185.556	1597	1365
	43.65	184.444	1596	1284
	43.7	201.667	1655	1317
	43.75	169.444	1623	1305
	43.8	210.556	1695	1274
	43.85	191.111	1563	1296
	43.9	185.556	1575	1263
	43.95	170	1668	1251
	44	177.778	1600	1265
	44.05	206.111	1612	1298
	44.1	199.444	1623	1313
	44.15	160	1626	1265
	44.2	213.333	1631	1282
	44.25	212.222	1651	1312
	44.3	193.889	1591	1304
	44.35	196.667	1625	1355
	44.4	193.889	1627	1306
	44.45	193.889	1591	1327
	44.5	176.111	1722	1360
	44.55	192.778	1561	1304
	44.6	182.778	1614	1332
	44.65	188.889	1569	1326
	44.7	184.444	1689	1305
	44.75	204.444	1738	1303
	44.8	197.778	1670	1354
	44.85	205	1589	1407
	44.9	189.444	1589	1373
	44.95	189.444	1620	1320
	45	195	1690	1330
	45.05	197.778	1667	1328
	45.1	190.556	1668	1344
	45.15	201.111	1563	1295
	45.2	188.889	1664	1291
	45.25	200	1666	1401
	45.3	206.111	1643	1323
	45.35	181.667	1618	1289
	45.4	209.444	1596	1233
	45.45	200	1615	1274
	45.5	188.889	1627	1340
	45.55	207.778	1608	1268
	45.6	192.778	1586	1267
	45.65	207.222	1639	1288
	45.7	198.333	1571	1243
	45.75	190	1588	1281
	45.8	195.556	1612	1279
	45.85	190	1635	1315
	45.9	192.222	1673	1247
	45.95	194.444	1662	1241
	46	216.667	1664	1266
	46.05	210	1618	1336
	46.1	206.111	1536	1263
	46.15	193.333	1609	1288
	46.2	197.778	1652	1279
	46.25	200.556	1566	1214
	46.3	197.222	1631	1260
	46.35	192.778	1666	1302
	46.4	201.667	1559	1263
	46.45	200	1625	1225
	46.5	221.111	1573	1291
	46.55	205.556	1617	1284
	46.6	199.444	1592	1249
	46.65	197.222	1624	1302
	46.7	196.111	1646	1297
	46.75	193.333	1669	1316
	46.8	213.889	1575	1301
	46.85	201.667	1613	1295
	46.9	203.889	1650	1344
	46.95	195.556	1592	1271
	47	212.778	1618	1311
	47.05	198.333	1551	1315
	47.1	215	1638	1268
	47.15	198.889	1572	1312
	47.2	211.667	1575	1305
	47.25	198.333	1625	1315
	47.3	225	1582	1283
	47.35	197.778	1549	1384
	47.4	221.667	1669	1292
	47.45	215	1708	1314
	47.5	225	1707	1313
	47.55	246.111	1589	1284
	47.6	233.889	1580	1253
	47.65	236.111	1568	1314
	47.7	248.889	1623	1291
	47.75	236.111	1525	1279
	47.8	239.444	1633	1262
	47.85	241.667	1612	1219
	47.9	262.778	1556	1334
	47.95	228.333	1585	1337
	48	257.222	1595	1298
	48.05	234.444	1661	1303
	48.1	205	1571	1378
	48.15	212.778	1607	1298
	48.2	218.333	1592	1272
	48.25	211.667	1555	1283
	48.3	199.444	1652	1287
	48.35	227.778	1666	1297
	48.4	219.444	1676	1350
	48.45	198.333	1556	1289
	48.5	201.667	1634	1315
	48.55	212.778	1552	1242
	48.6	186.667	1647	1267
	48.65	191.667	1503	1266
	48.7	225.556	1655	1291
	48.75	186.667	1549	1254
	48.8	199.444	1608	1327
	48.85	205.556	1646	1292
	48.9	211.111	1644	1356
	48.95	208.889	1640	1259
	49	206.111	1593	1358
	49.05	201.667	1619	1253
	49.1	222.778	1558	1339
	49.15	207.222	1629	1266
	49.2	234.444	1600	1289
	49.25	197.778	1622	1294
	49.3	207.222	1550	1352
	49.35	208.333	1601	1279
	49.4	239.444	1668	1267
	49.45	206.111	1578	1359
	49.5	211.111	1541	1263
	49.55	213.889	1577	1316
	49.6	221.111	1555	1258
	49.65	231.667	1623	1321
	49.7	242.778	1563	1289
	49.75	197.778	1621	1286
	49.8	218.889	1590	1302
	49.85	219.444	1683	1287
	49.9	205.556	1594	1275
	49.95	211.667	1567	1254
	50	227.222	1608	1277
	50.05	203.889	1620	1250
	50.1	225.556	1611	1293
	50.15	240	1639	1266
	50.2	230.556	1616	1219
	50.25	248.333	1625	1296
	50.3	220.556	1650	1289
	50.35	238.889	1593	1373
	50.4	209.444	1633	1381
	50.45	226.667	1587	1291
	50.5	226.667	1652	1296
	50.55	219.444	1589	1225
	50.6	227.778	1558	1278
	50.65	220	1656	1304
	50.7	214.444	1669	1254
	50.75	188.889	1567	1318
	50.8	207.222	1545	1193
	50.85	214.444	1602	1256
	50.9	204.444	1599	1299
	50.95	217.778	1586	1263
	51	213.889	1589	1295
	51.05	220.556	1577	1315
	51.1	219.444	1648	1307
	51.15	206.667	1598	1315
	51.2	221.111	1571	1258
	51.25	211.667	1701	1246
	51.3	206.111	1658	1335
	51.35	218.889	1615	1293
	51.4	238.333	1632	1319
	51.45	207.222	1579	1309
	51.5	213.889	1596	1307
	51.55	222.222	1584	1230
	51.6	213.333	1600	1309
	51.65	195.556	1677	1295
	51.7	215.556	1689	1347
	51.75	220.556	1613	1308
	51.8	225	1583	1255
	51.85	242.778	1592	1358
	51.9	223.333	1613	1277
	51.95	201.111	1583	1329
	52	201.667	1611	1288
	52.05	217.222	1545	1330
	52.1	211.667	1645	1276
	52.15	231.111	1561	1308
	52.2	207.222	1611	1263
	52.25	232.222	1598	1303
	52.3	230.556	1645	1305
	52.35	230	1634	1261
	52.4	213.333	1615	1324
	52.45	223.889	1617	1303
	52.5	213.333	1607	1278
	52.55	218.889	1613	1299
	52.6	216.111	1653	1270
	52.65	215.556	1593	1328
	52.7	205.556	1635	1307
	52.75	226.111	1626	1339
	52.8	211.667	1598	1272
	52.85	235.556	1605	1361
	52.9	205.556	1589	1297
	52.95	217.778	1623	1270
	53	226.667	1650	1267
	53.05	210	1703	1295
	53.1	202.778	1578	1281
	53.15	217.222	1610	1237
	53.2	243.333	1603	1359
	53.25	217.222	1626	1331
	53.3	223.333	1640	1293
	53.35	223.889	1621	1245
	53.4	231.111	1604	1324
	53.45	234.444	1609	1222
	53.5	242.222	1561	1323
	53.55	227.222	1577	1262
	53.6	232.778	1654	1300
	53.65	233.889	1570	1266
	53.7	225.556	1603	1288
	53.75	218.889	1552	1334
	53.8	211.111	1666	1277
	53.85	212.222	1624	1272
	53.9	206.111	1657	1307
	53.95	232.222	1631	1300
	54	225.556	1548	1337
	54.05	227.778	1594	1270
	54.1	227.778	1627	1333
	54.15	223.889	1540	1299
	54.2	205	1598	1320
	54.25	222.222	1626	1316
	54.3	216.667	1647	1331
	54.35	246.111	1647	1365
	54.4	225	1669	1311
	54.45	212.222	1553	1336
	54.5	213.333	1580	1341
	54.55	217.778	1603	1365
	54.6	237.778	1610	1340
	54.65	220.556	1635	1263
	54.7	230.556	1661	1253
	54.75	218.889	1581	1320
	54.8	228.333	1571	1283
	54.85	208.333	1662	1310
	54.9	233.333	1591	1295
	54.95	215.556	1633	1354
	55	221.667	1625	1270
	55.05	219.444	1597	1291
	55.1	226.667	1633	1297
	55.15	222.222	1568	1278
	55.2	230.556	1707	1275
	55.25	223.889	1606	1213
	55.3	234.444	1653	1301
	55.35	247.778	1579	1271
	55.4	233.333	1649	1320
	55.45	216.667	1559	1321
	55.5	205.556	1644	1306
	55.55	239.444	1601	1313
	55.6	223.333	1579	1315
	55.65	226.667	1639	1341
	55.7	217.778	1669	1318
	55.75	229.444	1665	1364
	55.8	221.111	1649	1372
	55.85	227.222	1617	1300
	55.9	238.889	1663	1350
	55.95	247.222	1648	1295
	56	231.667	1635	1282
	56.05	222.778	1708	1331
	56.1	250.556	1649	1287
	56.15	236.667	1651	1329
	56.2	240.556	1617	1277
	56.25	240.556	1531	1272
	56.3	236.667	1636	1351
	56.35	250	1679	1341
	56.4	257.778	1667	1283
	56.45	242.222	1625	1227
	56.5	213.333	1660	1274
	56.55	259.444	1577	1286
	56.6	253.333	1643	1242
	56.65	255	1638	1316
	56.7	261.667	1689	1320
	56.75	238.889	1545	1312
	56.8	246.111	1634	1318
	56.85	262.778	1620	1317
	56.9	237.778	1639	1285
	56.95	237.778	1605	1283
	57	246.667	1614	1315
	57.05	231.111	1625	1252
	57.1	231.667	1615	1363
	57.15	277.222	1599	1272
	57.2	255	1645	1296
	57.25	267.778	1647	1292
	57.3	270	1615	1287
	57.35	291.667	1585	1285
	57.4	272.222	1604	1313
	57.45	281.111	1612	1323
	57.5	303.889	1598	1315
	57.55	314.444	1625	1304
	57.6	308.333	1622	1297
	57.65	307.222	1612	1418
	57.7	323.889	1627	1228
	57.75	291.667	1704	1337
	57.8	296.111	1664	1291
	57.85	298.333	1564	1281
	57.9	275	1668	1281
	57.95	277.222	1623	1301
	58	271.667	1568	1236
	58.05	249.444	1602	1288
	58.1	268.333	1630	1353
	58.15	240.556	1717	1301
	58.2	268.889	1626	1403
	58.25	245	1630	1269
	58.3	250.556	1694	1352
	58.35	224.444	1660	1250
	58.4	210	1648	1262
	58.45	266.111	1658	1330
	58.5	247.778	1632	1298
	58.55	235	1660	1278
	58.6	217.222	1646	1345
	58.65	239.444	1602	1367
	58.7	232.222	1632	1269
	58.75	237.778	1690	1297
	58.8	255.556	1612	1314
	58.85	225.556	1597	1322
	58.9	240	1567	1297
	58.95	213.889	1578	1353
	59	233.889	1664	1297
	59.05	247.222	1660	1318
	59.1	244.444	1632	1281
	59.15	227.778	1591	1330
	59.2	247.778	1708	1385
	59.25	232.222	1609	1355
	59.3	227.778	1687	1337
	59.35	223.889	1715	1429
	59.4	233.333	1632	1396
	59.45	231.667	1641	1407
	59.5	238.889	1657	1490
	59.55	245	1668	1453
	59.6	242.222	1704	1408
	59.65	220	1627	1384
	59.7	237.222	1618	1413
	59.75	252.222	1670	1331
	59.8	235	1620	1353
	59.85	266.111	1540	1286
	59.9	220.556	1597	1406
	59.95	233.889	1637	1317
	60	231.667	1554	1363
	60.05	238.889	1580	1338
	60.1	265	1634	1274
	60.15	219.444	1577	1306
	60.2	232.222	1636	1383
	60.25	246.111	1649	1311
	60.3	240	1647	1297
	60.35	238.333	1684	1365
	60.4	232.222	1688	1342
	60.45	228.333	1589	1321
	60.5	241.111	1617	1281
	60.55	251.111	1651	1295
	60.6	237.222	1661	1297
	60.65	227.778	1601	1297
	60.7	241.667	1674	1310
	60.75	256.111	1573	1376
	60.8	248.333	1622	1365
	60.85	253.889	1652	1330
	60.9	243.889	1682	1310
	60.95	283.333	1674	1297
	61	275.556	1635	1377
	61.05	242.778	1658	1286
	61.1	250	1735	1304
	61.15	268.889	1627	1379
	61.2	247.778	1658	1318
	61.25	258.333	1663	1290
	61.3	257.222	1690	1287
	61.35	242.778	1770	1297
	61.4	257.778	1616	1283
	61.45	245.556	1725	1360
	61.5	257.222	1635	1372
	61.55	249.444	1753	1329
	61.6	245	1666	1317
	61.65	255	1673	1369
	61.7	228.333	1609	1287
	61.75	255	1638	1363
	61.8	242.222	1730	1337
	61.85	253.889	1715	1350
	61.9	243.333	1659	1322
	61.95	232.778	1670	1282
	62	233.889	1619	1333
	62.05	236.667	1666	1364
	62.1	228.333	1645	1292
	62.15	236.667	1635	1293
	62.2	240	1632	1350
	62.25	256.667	1660	1384
	62.3	247.222	1678	1343
	62.35	241.111	1658	1287
	62.4	252.222	1607	1375
	62.45	235.556	1594	1408
	62.5	247.778	1636	1325
	62.55	246.111	1657	1371
	62.6	233.333	1690	1323
	62.65	233.889	1612	1321
	62.7	247.778	1699	1276
	62.75	251.667	1675	1372
	62.8	246.111	1588	1308
	62.85	257.222	1643	1333
	62.9	252.222	1645	1334
	62.95	235	1612	1358
	63	245	1631	1263
	63.05	243.889	1649	1332
	63.1	250	1724	1292
	63.15	223.889	1617	1340
	63.2	257.778	1558	1306
	63.25	244.444	1602	1311
	63.3	255.556	1691	1305
	63.35	250.556	1662	1318
	63.4	257.222	1622	1329
	63.45	256.667	1661	1353
	63.5	260	1633	1275
	63.55	251.667	1602	1330
	63.6	247.778	1601	1366
	63.65	250	1582	1323
	63.7	237.222	1632	1369
	63.75	259.444	1711	1304
	63.8	241.667	1615	1368
	63.85	258.889	1623	1320
	63.9	262.222	1663	1285
	63.95	248.333	1633	1401
	64	255	1622	1281
	64.05	246.667	1648	1384
	64.1	253.333	1647	1287
	64.15	245.556	1668	1313
	64.2	258.333	1586	1337
	64.25	277.778	1600	1328
	64.3	236.111	1643	1320
	64.35	258.889	1592	1345
	64.4	260	1630	1375
	64.45	250	1724	1279
	64.5	267.222	1587	1325
	64.55	257.222	1636	1292
	64.6	275	1658	1338
	64.65	267.778	1710	1358
	64.7	252.778	1664	1399
	64.75	273.333	1666	1368
	64.8	250	1697	1305
	64.85	255	1593	1414
	64.9	259.444	1680	1325
	64.95	246.667	1645	1401
	65	247.778	1594	1350
	65.05	258.889	1684	1370
	65.1	257.778	1743	1343
	65.15	269.444	1671	1428
	65.2	253.333	1688	1395
	65.25	256.111	1653	1480
	65.3	268.889	1705	1433
	65.35	272.222	1677	1425
	65.4	275	1737	1445
	65.45	256.667	1686	1403
	65.5	267.778	1655	1411
	65.55	265	1688	1446
	65.6	269.444	1681	1387
	65.65	272.222	1654	1334
	65.7	290	1598	1376
	65.75	290	1663	1381
	65.8	275.556	1672	1346
	65.85	273.333	1660	1320
	65.9	291.111	1581	1350
	65.95	290	1698	1279
	66	275	1620	1334
	66.05	297.222	1648	1333
	66.1	287.778	1661	1290
	66.15	230.556	1602	1353
	66.2	245	1672	1349
	66.25	273.333	1662	1327
	66.3	261.667	1637	1291
	66.35	256.667	1652	1298
	66.4	261.111	1589	1331
	66.45	262.222	1649	1375
	66.5	292.778	1720	1301
	66.55	272.778	1657	1326
	66.6	265.556	1599	1305
	66.65	280.556	1582	1330
	66.7	267.778	1627	1309
	66.75	264.444	1650	1333
	66.8	267.222	1626	1323
	66.85	257.222	1623	1281
	66.9	258.889	1693	1320
	66.95	261.111	1624	1340
	67	277.222	1610	1317
	67.05	257.222	1710	1379
	67.1	262.222	1557	1363
	67.15	255	1589	1312
	67.2	261.667	1725	1353
	67.25	282.778	1654	1275
	67.3	255	1621	1332
	67.35	278.333	1634	1341
	67.4	256.667	1666	1360
	67.45	265	1582	1318
	67.5	268.889	1617	1305
	67.55	229.444	1607	1348
	67.6	267.778	1665	1340
	67.65	248.333	1657	1280
	67.7	270.556	1620	1334
	67.75	245	1599	1300
	67.8	255	1590	1343
	67.85	242.222	1636	1355
	67.9	247.778	1632	1301
	67.95	256.667	1611	1250
	68	248.889	1593	1346
	68.05	258.889	1624	1301
	68.1	277.222	1584	1240
	68.15	263.889	1573	1284
	68.2	263.889	1621	1305
	68.25	270.556	1625	1322
	68.3	277.222	1628	1377
	68.35	269.444	1643	1379
	68.4	290	1632	1353
	68.45	264.444	1625	1345
	68.5	288.889	1592	1278
	68.55	273.333	1682	1311
	68.6	263.889	1663	1392
	68.65	256.667	1628	1361
	68.7	261.111	1567	1325
	68.75	287.222	1649	1319
	68.8	256.111	1669	1354
	68.85	259.444	1606	1313
	68.9	269.444	1570	1395
	68.95	250.556	1581	1342
	69	267.222	1608	1430
	69.05	253.333	1602	1317
	69.1	237.778	1660	1338
	69.15	267.222	1612	1335
	69.2	282.778	1689	1425
	69.25	286.667	1633	1331
	69.3	248.889	1626	1325
	69.35	272.222	1615	1299
	69.4	247.222	1589	1370
	69.45	260.556	1616	1343
	69.5	292.222	1550	1314
	69.55	265	1560	1371
	69.6	266.111	1625	1287
	69.65	250	1649	1312
	69.7	251.111	1674	1319
	69.75	268.333	1658	1354
	69.8	246.667	1722	1330
	69.85	238.889	1622	1321
	69.9	268.889	1691	1365
	69.95	256.667	1598	1309
	70	279.444	1665	1412
	70.05	291.111	1630	1378
	70.1	261.111	1675	1380
	70.15	246.111	1570	1311
	70.2	270	1673	1320
	70.25	260.556	1610	1300
	70.3	245	1655	1332
	70.35	271.111	1610	1359
	70.4	277.778	1661	1318
	70.45	281.667	1606	1313
	70.5	271.111	1635	1333
	70.55	289.444	1622	1360
	70.6	272.778	1625	1316
	70.65	292.778	1629	1321
	70.7	275.556	1681	1301
	70.75	257.778	1602	1388
	70.8	296.111	1565	1339
	70.85	267.222	1635	1353
	70.9	249.444	1640	1295
	70.95	273.889	1564	1303
	71	266.667	1739	1383
	71.05	259.444	1643	1300
	71.1	258.333	1629	1352
	71.15	264.444	1595	1401
	71.2	297.778	1603	1356
	71.25	274.444	1686	1331
	71.3	262.222	1532	1361
	71.35	271.667	1661	1304
	71.4	279.444	1562	1329
	71.45	268.333	1679	1364
	71.5	261.111	1599	1417
	71.55	276.667	1662	1316
	71.6	271.667	1572	1389
	71.65	253.889	1609	1355
	71.7	276.111	1609	1274
	71.75	268.333	1656	1334
	71.8	273.889	1654	1369
	71.85	269.444	1611	1387
	71.9	268.889	1673	1291
	71.95	272.778	1602	1339
	72	287.778	1619	1406
	72.05	268.889	1631	1292
	72.1	258.889	1723	1372
	72.15	270	1746	1322
	72.2	283.889	1651	1314
	72.25	291.111	1607	1359
	72.3	272.778	1602	1352
	72.35	257.222	1589	1369
	72.4	264.444	1637	1369
	72.45	292.778	1763	1324
	72.5	262.778	1591	1300
	72.55	286.667	1673	1378
	72.6	298.889	1716	1304
	72.65	285	1608	1313
	72.7	262.778	1704	1366
	72.75	284.444	1640	1391
	72.8	251.667	1591	1365
	72.85	265.556	1583	1372
	72.9	293.889	1627	1292
	72.95	264.444	1673	1283
	73	281.667	1620	1391
	73.05	293.889	1641	1364
	73.1	257.222	1578	1329
	73.15	280.556	1683	1363
	73.2	279.444	1664	1332
	73.25	253.333	1607	1366
	73.3	275	1637	1387
	73.35	277.778	1657	1385
	73.4	285	1605	1352
	73.45	288.889	1654	1403
	73.5	282.778	1667	1366
	73.55	280.556	1655	1320
	73.6	257.222	1647	1410
	73.65	298.333	1684	1344
	73.7	272.778	1654	1272
	73.75	271.111	1692	1361
	73.8	277.222	1601	1328
	73.85	282.778	1658	1363
	73.9	286.667	1715	1337
	73.95	270	1635	1353
	74	275.556	1596	1306
	74.05	287.222	1639	1357
	74.1	278.333	1636	1359
	74.15	254.444	1701	1398
	74.2	273.333	1699	1312
	74.25	295.556	1618	1318
	74.3	270.556	1699	1347
	74.35	285	1596	1348
	74.4	276.111	1602	1380
	74.45	236.667	1652	1326
	74.5	261.667	1657	1313
	74.55	275	1596	1313
	74.6	265	1635	1313
	74.65	276.667	1638	1359
	74.7	276.111	1639	1296
	74.75	282.222	1630	1332
	74.8	283.889	1581	1343
	74.85	280	1582	1328
	74.9	285.556	1708	1301
	74.95	263.333	1648	1377
	75	265.556	1659	1339
	75.05	267.222	1633	1373
	75.1	270.556	1560	1393
	75.15	256.667	1568	1326
	75.2	265	1616	1352
	75.25	262.778	1617	1345
	75.3	289.444	1666	1363
	75.35	291.667	1653	1383
	75.4	272.222	1670	1402
	75.45	256.111	1605	1300
	75.5	290.556	1653	1418
	75.55	276.667	1523	1350
	75.6	289.444	1697	1363
	75.65	266.111	1631	1325
	75.7	300	1679	1353
	75.75	272.222	1700	1367
	75.8	264.444	1673	1325
	75.85	276.111	1628	1360
	75.9	265.556	1695	1242
	75.95	267.778	1663	1408
	76	277.222	1645	1394
	76.05	306.111	1641	1333
	76.1	283.889	1604	1319
	76.15	270	1683	1308
	76.2	271.111	1667	1314
	76.25	282.778	1667	1352
	76.3	291.111	1593	1361
	76.35	266.667	1643	1358
	76.4	265	1594	1337
	76.45	306.667	1595	1400
	76.5	291.667	1579	1396
	76.55	276.111	1667	1346
	76.6	284.444	1586	1352
	76.65	306.111	1478	1344
	76.7	282.778	1653	1406
	76.75	268.333	1631	1375
	76.8	286.667	1744	1421
	76.85	279.444	1604	1374
	76.9	267.222	1597	1399
	76.95	280.556	1687	1343
	77	267.222	1700	1366
	77.05	292.222	1597	1391
	77.1	282.778	1680	1367
	77.15	281.667	1654	1392
	77.2	275	1612	1372
	77.25	277.222	1595	1373
	77.3	276.667	1659	1388
	77.35	292.222	1611	1375
	77.4	284.444	1674	1396
	77.45	282.778	1727	1388
	77.5	290.556	1677	1313
	77.55	291.111	1638	1396
	77.6	275	1711	1335
	77.65	293.889	1663	1469
	77.7	303.333	1667	1339
	77.75	274.444	1651	1384
	77.8	292.222	1685	1377
	77.85	290	1678	1373
	77.9	301.111	1697	1306
	77.95	276.667	1708	1344
	78	308.889	1705	1425
	78.05	255	1660	1401
	78.1	306.111	1707	1385
	78.15	271.111	1694	1397
	78.2	317.222	1607	1347
	78.25	271.111	1668	1313
	78.3	267.778	1639	1381
	78.35	289.444	1601	1329
	78.4	306.667	1625	1420
	78.45	292.778	1648	1366
	78.5	282.778	1644	1397
	78.55	296.667	1608	1333
	78.6	300.556	1667	1328
	78.65	262.778	1663	1360
	78.7	274.444	1682	1380
	78.75	300	1617	1427
	78.8	299.444	1692	1386
	78.85	289.444	1656	1363
		291.667	1587	1419
	78.95	297.778	1676	1311
	79	270	1589	1402
	79.05	275	1560	1369
	79.1	293.889	1743	1300
	79.15	288.333	1684	1334
	79.2	263.889	1625	1341
	79.25	291.111	1622	1377
	79.3	283.889	1668	1383
	79.35	290.556	1749	1345
	79.4	266.111	1578	1346
	79.45	261.667	1635	1355
	79.5	281.111	1692	1403
	79.55	286.111	1699	1348
	79.6	300	1656	1401
	79.65	296.667	1569	1316
	79.7	282.778	1695	1311
	79.75	270	1687	1395
	79.8	268.333	1607	1305
	79.85	276.667	1589	1331
	79.9	271.667	1645	1354
	79.95	303.333	1629	1352
	80	286.667	1651	1301

## Sheet: Sheet2
			1% Ru-Co	2% Ru-Co	3% Ru-Co
		33	155.556	1574	1253
		33.05	170.556	1527	1219
		33.1	156.111	1617	1195
		33.15	160	1582	1260
		33.2	159.444	1566	1145
		33.25	163.333	1569	1185
		33.3	158.333	1559	1231
		33.35	161.667	1583	1264
		33.4	165.556	1448	1243
		33.45	147.222	1608	1285
		33.5	158.889	1632	1312
		33.55	175	1502	1236
		33.6	160.556	1621	1266
		33.65	159.444	1582	1255
		33.7	167.222	1618	1297
		33.75	164.444	1600	1291
		33.8	160.556	1625	1310
		33.85	162.778	1541	1285
		33.9	153.889	1546	1195
		33.95	196.111	1567	1148
		34	170	1565	1276
		34.05	179.444	1579	1229
		34.1	178.333	1576	1196
		34.15	177.222	1528	1205
		34.2	177.778	1608	1203
		34.25	157.778	1599	1259
		34.3	160.556	1589	1205
		34.35	168.333	1557	1187
		34.4	178.333	1617	1269
		34.45	165	1582	1276
		34.5	156.111	1575	1218
		34.55	172.222	1594	1261
		34.6	148.333	1617	1238
		34.65	178.889	1539	1186
		34.7	175	1542	1229
		34.75	171.667	1523	1287
		34.8	155.556	1570	1220
		34.85	153.889	1600	1263
		34.9	171.111	1553	1285
		34.95	155	1571	1223
		35	160	1559	1181
		35.05	178.889	1585	1254
		35.1	165	1560	1170
		35.15	160	1590	1234
		35.2	174.444	1566	1292
		35.25	170.556	1571	1260
		35.3	176.667	1626	1194
		35.35	159.444	1536	1279
		35.4	172.222	1576	1290
		35.45	177.222	1542	1292
		35.5	163.333	1601	1259
		35.55	170	1526	1231
		35.6	180	1634	1253
		35.65	163.333	1623	1281
		35.7	172.222	1577	1193
		35.75	177.222	1623	1301
		35.8	172.778	1608	1225
		35.85	163.333	1657	1302
		35.9	156.111	1634	1260
		35.95	176.111	1683	1273
		36	163.333	1616	1278
		36.05	176.667	1665	1288
		36.1	163.889	1730	1209
		36.15	157.778	1723	1279
		36.2	170.556	1679	1342
		36.25	181.111	1759	1259
		36.3	162.222	1685	1278
		36.35	176.111	1710	1276
		36.4	160.556	1823	1253
		36.45	183.333	1692	1321
		36.5	177.222	1723	1281
		36.55	184.444	1887	1276
		36.6	173.333	1871	1366
		36.65	168.889	1852	1391
		36.7	177.222	1846	1392
		36.75	166.667	1768	1440
		36.8	175	1785	1466
		36.85	167.778	1808	1536
		36.9	174.444	1808	1642
		36.95	175.556	1813	1642
		37	159.444	1679	1681
		37.05	171.667	1646	1715
		37.1	170	1682	1476
		37.15	158.889	1754	1447
		37.2	173.889	1729	1374
		37.25	182.222	1608	1343
		37.3	154.444	1625	1287
		37.35	191.111	1571	1289
		37.4	171.667	1562	1303
		37.45	169.444	1616	1281
		37.5	180	1603	1301
		37.55	177.778	1611	1312
		37.6	176.667	1631	1281
		37.65	165.556	1588	1247
		37.7	177.222	1693	1294
		37.75	177.222	1657	1303
		37.8	176.667	1682	1321
		37.85	174.444	1672	1269
		37.9	180	1618	1313
		37.95	147.222	1647	1266
		38	172.778	1673	1231
		38.05	171.667	1610	1260
		38.1	165	1650	1211
		38.15	163.333	1637	1276
		38.2	160.556	1634	1273
		38.25	172.222	1619	1262
		38.3	172.778	1603	1278
		38.35	177.778	1648	1282
		38.4	173.333	1625	1253
		38.45	172.778	1568	1260
		38.5	184.444	1586	1317
		38.55	173.333	1657	1292
		38.6	169.444	1691	1318
		38.65	197.778	1621	1332
		38.7	178.333	1657	1272
		38.75	181.667	1567	1318
		38.8	178.889	1563	1266
		38.85	171.667	1597	1321
		38.9	177.778	1585	1298
		38.95	173.889	1587	1281
		39	173.333	1536	1281
		39.05	172.778	1620	1297
		39.1	189.444	1659	1272
		39.15	182.222	1550	1231
		39.2	166.111	1563	1284
		39.25	177.778	1677	1303
		39.3	178.889	1648	1277
		39.35	182.778	1627	1298
		39.4	182.222	1599	1211
		39.45	188.889	1576	1326
		39.5	167.778	1514	1260
		39.55	182.778	1631	1203
		39.6	179.444	1567	1237
		39.65	178.889	1565	1217
		39.7	186.111	1590	1228
		39.75	183.889	1549	1307
		39.8	188.889	1614	1219
		39.85	189.444	1549	1250
		39.9	192.778	1583	1321
		39.95	178.333	1589	1288
		40	189.444	1630	1265
		40.05	195.556	1602	1246
		40.1	175	1646	1197
		40.15	168.333	1569	1269
		40.2	179.444	1603	1263
		40.25	182.778	1557	1267
		40.3	178.889	1644	1230
		40.35	189.444	1574	1219
		40.4	173.333	1559	1325
		40.45	182.222	1581	1276
		40.5	184.444	1615	1239
		40.55	194.444	1580	1225
		40.6	196.667	1628	1260
		40.65	190.556	1539	1214
		40.7	178.889	1607	1295
		40.75	176.111	1674	1315
		40.8	202.222	1653	1240
		40.85	180	1597	1316
		40.9	186.111	1601	1273
		40.95	179.444	1545	1252
		41	187.778	1606	1386
		41.05	203.889	1587	1231
		41.1	181.111	1557	1245
		41.15	168.889	1684	1246
		41.2	186.667	1570	1294
		41.25	184.444	1571	1290
		41.3	182.778	1559	1290
		41.35	188.889	1601	1272
		41.4	177.222	1550	1322
		41.45	192.222	1675	1280
		41.5	186.111	1651	1264
		41.55	192.222	1634	1268
		41.6	178.333	1550	1247
		41.65	191.111	1659	1298
		41.7	183.889	1639	1279
		41.75	190.556	1624	1293
		41.8	196.667	1566	1268
		41.85	196.111	1595	1335
		41.9	183.333	1615	1233
		41.95	202.222	1620	1290
		42	182.778	1616	1303
		42.05	187.778	1627	1249
		42.1	192.778	1696	1274
		42.15	201.111	1707	1279
		42.2	197.222	1607	1260
		42.25	189.444	1696	1305
		42.3	193.889	1711	1356
		42.35	203.889	1790	1320
		42.4	168.889	1790	1301
		42.45	196.111	1754	1271
		42.5	191.667	1779	1271
		42.55	188.889	1791	1325
		42.6	180	1789	1282
		42.65	180.556	1771	1347
		42.7	163.889	1752	1315
		42.75	173.889	1728	1334
		42.8	167.222	1634	1254
		42.85	186.111	1685	1322
		42.9	191.667	1684	1346
		42.95	179.444	1680	1288
		43	208.889	1682	1225
		43.05	190	1634	1296
		43.1	200	1687	1246
		43.15	186.667	1663	1274
		43.2	187.222	1628	1249
		43.25	195	1563	1277
		43.3	183.889	1688	1328
		43.35	178.889	1652	1304
		43.4	200.556	1615	1258
		43.45	191.667	1621	1288
		43.5	205.556	1613	1289
		43.55	193.333	1647	1263
		43.6	185.556	1597	1365
		43.65	184.444	1596	1284
		43.7	201.667	1655	1317
		43.75	169.444	1623	1305
		43.8	210.556	1695	1274
		43.85	191.111	1563	1296
		43.9	185.556	1575	1263
		43.95	170	1668	1251
		44	177.778	1600	1265
		44.05	206.111	1612	1298
		44.1	199.444	1623	1313
		44.15	160	1626	1265
		44.2	213.333	1631	1282
		44.25	212.222	1651	1312
		44.3	193.889	1591	1304
		44.35	196.667	1625	1355
		44.4	193.889	1627	1306
		44.45	193.889	1591	1327
		44.5	176.111	1722	1360
		44.55	192.778	1561	1304
		44.6	182.778	1614	1332
		44.65	188.889	1569	1326
		44.7	184.444	1689	1305
		44.75	204.444	1738	1303
		44.8	197.778	1670	1354
		44.85	205	1589	1407
		44.9	189.444	1589	1373
		44.95	189.444	1620	1320
		45	195	1690	1330
		45.05	197.778	1667	1328
		45.1	190.556	1668	1344
		45.15	201.111	1563	1295
		45.2	188.889	1664	1291
		45.25	200	1666	1401
		45.3	206.111	1643	1323
		45.35	181.667	1618	1289
		45.4	209.444	1596	1233
		45.45	200	1615	1274
		45.5	188.889	1627	1340
		45.55	207.778	1608	1268
		45.6	192.778	1586	1267
		45.65	207.222	1639	1288
		45.7	198.333	1571	1243
		45.75	190	1588	1281
		45.8	195.556	1612	1279
		45.85	190	1635	1315
		45.9	192.222	1673	1247
		45.95	194.444	1662	1241
		46	216.667	1664	1266
		46.05	210	1618	1336
		46.1	206.111	1536	1263
		46.15	193.333	1609	1288
		46.2	197.778	1652	1279
		46.25	200.556	1566	1214
		46.3	197.222	1631	1260
		46.35	192.778	1666	1302
		46.4	201.667	1559	1263
		46.45	200	1625	1225
		46.5	221.111	1573	1291
		46.55	205.556	1617	1284
		46.6	199.444	1592	1249
		46.65	197.222	1624	1302
		46.7	196.111	1646	1297
		46.75	193.333	1669	1316
		46.8	213.889	1575	1301
		46.85	201.667	1613	1295
		46.9	203.889	1650	1344
		46.95	195.556	1592	1271
		47	212.778	1618	1311
		47.05	198.333	1551	1315
		47.1	215	1638	1268
		47.15	198.889	1572	1312
		47.2	211.667	1575	1305
		47.25	198.333	1625	1315
		47.3	225	1582	1283
		47.35	197.778	1549	1384
		47.4	221.667	1669	1292
		47.45	215	1708	1314
		47.5	225	1707	1313
		47.55	246.111	1589	1284
		47.6	233.889	1580	1253
		47.65	236.111	1568	1314
		47.7	248.889	1623	1291
		47.75	236.111	1525	1279
		47.8	239.444	1633	1262
		47.85	241.667	1612	1219
		47.9	262.778	1556	1334
		47.95	228.333	1585	1337
		48	257.222	1595	1298
		48.05	234.444	1661	1303
		48.1	205	1571	1378
		48.15	212.778	1607	1298
		48.2	218.333	1592	1272
		48.25	211.667	1555	1283
		48.3	199.444	1652	1287
		48.35	227.778	1666	1297
		48.4	219.444	1676	1350
		48.45	198.333	1556	1289
		48.5	201.667	1634	1315
		48.55	212.778	1552	1242
		48.6	186.667	1647	1267
		48.65	191.667	1503	1266
		48.7	225.556	1655	1291
		48.75	186.667	1549	1254
		48.8	199.444	1608	1327
		48.85	205.556	1646	1292
		48.9	211.111	1644	1356
		48.95	208.889	1640	1259
		49	206.111	1593	1358
		49.05	201.667	1619	1253
		49.1	222.778	1558	1339
		49.15	207.222	1629	1266
		49.2	234.444	1600	1289
		49.25	197.778	1622	1294
		49.3	207.222	1550	1352
		49.35	208.333	1601	1279
		49.4	239.444	1668	1267
		49.45	206.111	1578	1359
		49.5	211.111	1541	1263
		49.55	213.889	1577	1316
		49.6	221.111	1555	1258
		49.65	231.667	1623	1321
		49.7	242.778	1563	1289
		49.75	197.778	1621	1286
		49.8	218.889	1590	1302
		49.85	219.444	1683	1287
		49.9	205.556	1594	1275
		49.95	211.667	1567	1254
		50	227.222	1608	1277
		50.05	203.889	1620	1250
		50.1	225.556	1611	1293
		50.15	240	1639	1266
		50.2	230.556	1616	1219
		50.25	248.333	1625	1296
		50.3	220.556	1650	1289
		50.35	238.889	1593	1373
		50.4	209.444	1633	1381
		50.45	226.667	1587	1291
		50.5	226.667	1652	1296
		50.55	219.444	1589	1225
		50.6	227.778	1558	1278
		50.65	220	1656	1304
		50.7	214.444	1669	1254
		50.75	188.889	1567	1318
		50.8	207.222	1545	1193
		50.85	214.444	1602	1256
		50.9	204.444	1599	1299
		50.95	217.778	1586	1263
		51	213.889	1589	1295
		51.05	220.556	1577	1315
		51.1	219.444	1648	1307
		51.15	206.667	1598	1315
		51.2	221.111	1571	1258
		51.25	211.667	1701	1246
		51.3	206.111	1658	1335
		51.35	218.889	1615	1293
		51.4	238.333	1632	1319
		51.45	207.222	1579	1309
		51.5	213.889	1596	1307
		51.55	222.222	1584	1230
		51.6	213.333	1600	1309
		51.65	195.556	1677	1295
		51.7	215.556	1689	1347
		51.75	220.556	1613	1308
		51.8	225	1583	1255
		51.85	242.778	1592	1358
		51.9	223.333	1613	1277
		51.95	201.111	1583	1329
		52	201.667	1611	1288
		52.05	217.222	1545	1330
		52.1	211.667	1645	1276
		52.15	231.111	1561	1308
		52.2	207.222	1611	1263
		52.25	232.222	1598	1303
		52.3	230.556	1645	1305
		52.35	230	1634	1261
		52.4	213.333	1615	1324
		52.45	223.889	1617	1303
		52.5	213.333	1607	1278
		52.55	218.889	1613	1299
		52.6	216.111	1653	1270
		52.65	215.556	1593	1328
		52.7	205.556	1635	1307
		52.75	226.111	1626	1339
		52.8	211.667	1598	1272
		52.85	235.556	1605	1361
		52.9	205.556	1589	1297
		52.95	217.778	1623	1270
		53	226.667	1650	1267
		53.05	210	1703	1295
		53.1	202.778	1578	1281
		53.15	217.222	1610	1237
		53.2	243.333	1603	1359
		53.25	217.222	1626	1331
		53.3	223.333	1640	1293
		53.35	223.889	1621	1245
		53.4	231.111	1604	1324
		53.45	234.444	1609	1222
		53.5	242.222	1561	1323
		53.55	227.222	1577	1262
		53.6	232.778	1654	1300
		53.65	233.889	1570	1266
		53.7	225.556	1603	1288
		53.75	218.889	1552	1334
		53.8	211.111	1666	1277
		53.85	212.222	1624	1272
		53.9	206.111	1657	1307
		53.95	232.222	1631	1300
		54	225.556	1548	1337
		54.05	227.778	1594	1270
		54.1	227.778	1627	1333
		54.15	223.889	1540	1299
		54.2	205	1598	1320
		54.25	222.222	1626	1316
		54.3	216.667	1647	1331
		54.35	246.111	1647	1365
		54.4	225	1669	1311
		54.45	212.222	1553	1336
		54.5	213.333	1580	1341
		54.55	217.778	1603	1365
		54.6	237.778	1610	1340
		54.65	220.556	1635	1263
		54.7	230.556	1661	1253
		54.75	218.889	1581	1320
		54.8	228.333	1571	1283
		54.85	208.333	1662	1310
		54.9	233.333	1591	1295
		54.95	215.556	1633	1354
		55	221.667	1625	1270
		55.05	219.444	1597	1291
		55.1	226.667	1633	1297
		55.15	222.222	1568	1278
		55.2	230.556	1707	1275
		55.25	223.889	1606	1213
		55.3	234.444	1653	1301
		55.35	247.778	1579	1271
		55.4	233.333	1649	1320
		55.45	216.667	1559	1321
		55.5	205.556	1644	1306
		55.55	239.444	1601	1313
		55.6	223.333	1579	1315
		55.65	226.667	1639	1341
		55.7	217.778	1669	1318
		55.75	229.444	1665	1364
		55.8	221.111	1649	1372
		55.85	227.222	1617	1300
		55.9	238.889	1663	1350
		55.95	247.222	1648	1295
		56	231.667	1635	1282
		56.05	222.778	1708	1331
		56.1	250.556	1649	1287
		56.15	236.667	1651	1329
		56.2	240.556	1617	1277
		56.25	240.556	1531	1272
		56.3	236.667	1636	1351
		56.35	250	1679	1341
		56.4	257.778	1667	1283
		56.45	242.222	1625	1227
		56.5	213.333	1660	1274
		56.55	259.444	1577	1286
		56.6	253.333	1643	1242
		56.65	255	1638	1316
		56.7	261.667	1689	1320
		56.75	238.889	1545	1312
		56.8	246.111	1634	1318
		56.85	262.778	1620	1317
		56.9	237.778	1639	1285
		56.95	237.778	1605	1283
		57	246.667	1614	1315
		57.05	231.111	1625	1252
		57.1	231.667	1615	1363
		57.15	277.222	1599	1272
		57.2	255	1645	1296
		57.25	267.778	1647	1292
		57.3	270	1615	1287
		57.35	291.667	1585	1285
		57.4	272.222	1604	1313
		57.45	281.111	1612	1323
		57.5	303.889	1598	1315
		57.55	314.444	1625	1304
		57.6	308.333	1622	1297
		57.65	307.222	1612	1418
		57.7	323.889	1627	1228
		57.75	291.667	1704	1337
		57.8	296.111	1664	1291
		57.85	298.333	1564	1281
		57.9	275	1668	1281
		57.95	277.222	1623	1301
		58	271.667	1568	1236
		58.05	249.444	1602	1288
		58.1	268.333	1630	1353
		58.15	240.556	1717	1301
		58.2	268.889	1626	1403
		58.25	245	1630	1269
		58.3	250.556	1694	1352
		58.35	224.444	1660	1250
		58.4	210	1648	1262
		58.45	266.111	1658	1330
		58.5	247.778	1632	1298
		58.55	235	1660	1278
		58.6	217.222	1646	1345
		58.65	239.444	1602	1367
		58.7	232.222	1632	1269
		58.75	237.778	1690	1297
		58.8	255.556	1612	1314
		58.85	225.556	1597	1322
		58.9	240	1567	1297
		58.95	213.889	1578	1353
		59	233.889	1664	1297
		59.05	247.222	1660	1318
		59.1	244.444	1632	1281
		59.15	227.778	1591	1330
		59.2	247.778	1708	1385
		59.25	232.222	1609	1355
		59.3	227.778	1687	1337
		59.35	223.889	1715	1429
		59.4	233.333	1632	1396
		59.45	231.667	1641	1407
		59.5	238.889	1657	1490
		59.55	245	1668	1453
		59.6	242.222	1704	1408
		59.65	220	1627	1384
		59.7	237.222	1618	1413
		59.75	252.222	1670	1331
		59.8	235	1620	1353
		59.85	266.111	1540	1286
		59.9	220.556	1597	1406
		59.95	233.889	1637	1317
		60	231.667	1554	1363
		60.05	238.889	1580	1338
		60.1	265	1634	1274
		60.15	219.444	1577	1306
		60.2	232.222	1636	1383
		60.25	246.111	1649	1311
		60.3	240	1647	1297
		60.35	238.333	1684	1365
		60.4	232.222	1688	1342
		60.45	228.333	1589	1321
		60.5	241.111	1617	1281
		60.55	251.111	1651	1295
		60.6	237.222	1661	1297
		60.65	227.778	1601	1297
		60.7	241.667	1674	1310
		60.75	256.111	1573	1376
		60.8	248.333	1622	1365
		60.85	253.889	1652	1330
		60.9	243.889	1682	1310
		60.95	283.333	1674	1297
		61	275.556	1635	1377
		61.05	242.778	1658	1286
		61.1	250	1735	1304
		61.15	268.889	1627	1379
		61.2	247.778	1658	1318
		61.25	258.333	1663	1290
		61.3	257.222	1690	1287
		61.35	242.778	1770	1297
		61.4	257.778	1616	1283
		61.45	245.556	1725	1360
		61.5	257.222	1635	1372
		61.55	249.444	1753	1329
		61.6	245	1666	1317
		61.65	255	1673	1369
		61.7	228.333	1609	1287
		61.75	255	1638	1363
		61.8	242.222	1730	1337
		61.85	253.889	1715	1350
		61.9	243.333	1659	1322
		61.95	232.778	1670	1282
		62	233.889	1619	1333
		62.05	236.667	1666	1364
		62.1	228.333	1645	1292
		62.15	236.667	1635	1293
		62.2	240	1632	1350
		62.25	256.667	1660	1384
		62.3	247.222	1678	1343
		62.35	241.111	1658	1287
		62.4	252.222	1607	1375
		62.45	235.556	1594	1408
		62.5	247.778	1636	1325
		62.55	246.111	1657	1371
		62.6	233.333	1690	1323
		62.65	233.889	1612	1321
		62.7	247.778	1699	1276
		62.75	251.667	1675	1372
		62.8	246.111	1588	1308
		62.85	257.222	1643	1333
		62.9	252.222	1645	1334
		62.95	235	1612	1358
		63	245	1631	1263
		63.05	243.889	1649	1332
		63.1	250	1724	1292
		63.15	223.889	1617	1340
		63.2	257.778	1558	1306
		63.25	244.444	1602	1311
		63.3	255.556	1691	1305
		63.35	250.556	1662	1318
		63.4	257.222	1622	1329
		63.45	256.667	1661	1353
		63.5	260	1633	1275
		63.55	251.667	1602	1330
		63.6	247.778	1601	1366
		63.65	250	1582	1323
		63.7	237.222	1632	1369
		63.75	259.444	1711	1304
		63.8	241.667	1615	1368
		63.85	258.889	1623	1320
		63.9	262.222	1663	1285
		63.95	248.333	1633	1401
		64	255	1622	1281
		64.05	246.667	1648	1384
		64.1	253.333	1647	1287
		64.15	245.556	1668	1313
		64.2	258.333	1586	1337
		64.25	277.778	1600	1328
		64.3	236.111	1643	1320
		64.35	258.889	1592	1345
		64.4	260	1630	1375
		64.45	250	1724	1279
		64.5	267.222	1587	1325
		64.55	257.222	1636	1292
		64.6	275	1658	1338
		64.65	267.778	1710	1358
		64.7	252.778	1664	1399
		64.75	273.333	1666	1368
		64.8	250	1697	1305
		64.85	255	1593	1414
		64.9	259.444	1680	1325
		64.95	246.667	1645	1401
		65	247.778	1594	1350
		65.05	258.889	1684	1370
		65.1	257.778	1743	1343
		65.15	269.444	1671	1428
		65.2	253.333	1688	1395
		65.25	256.111	1653	1480
		65.3	268.889	1705	1433
		65.35	272.222	1677	1425
		65.4	275	1737	1445
		65.45	256.667	1686	1403
		65.5	267.778	1655	1411
		65.55	265	1688	1446
		65.6	269.444	1681	1387
		65.65	272.222	1654	1334
		65.7	290	1598	1376
		65.75	290	1663	1381
		65.8	275.556	1672	1346
		65.85	273.333	1660	1320
		65.9	291.111	1581	1350
		65.95	290	1698	1279
		66	275	1620	1334
		66.05	297.222	1648	1333
		66.1	287.778	1661	1290
		66.15	230.556	1602	1353
		66.2	245	1672	1349
		66.25	273.333	1662	1327
		66.3	261.667	1637	1291
		66.35	256.667	1652	1298
		66.4	261.111	1589	1331
		66.45	262.222	1649	1375
		66.5	292.778	1720	1301
		66.55	272.778	1657	1326
		66.6	265.556	1599	1305
		66.65	280.556	1582	1330
		66.7	267.778	1627	1309
		66.75	264.444	1650	1333
		66.8	267.222	1626	1323
		66.85	257.222	1623	1281
		66.9	258.889	1693	1320
		66.95	261.111	1624	1340
		67	277.222	1610	1317
		67.05	257.222	1710	1379
		67.1	262.222	1557	1363
		67.15	255	1589	1312
		67.2	261.667	1725	1353
		67.25	282.778	1654	1275
		67.3	255	1621	1332
		67.35	278.333	1634	1341
		67.4	256.667	1666	1360
		67.45	265	1582	1318
		67.5	268.889	1617	1305
		67.55	229.444	1607	1348
		67.6	267.778	1665	1340
		67.65	248.333	1657	1280
		67.7	270.556	1620	1334
		67.75	245	1599	1300
		67.8	255	1590	1343
		67.85	242.222	1636	1355
		67.9	247.778	1632	1301
		67.95	256.667	1611	1250
		68	248.889	1593	1346
		68.05	258.889	1624	1301
		68.1	277.222	1584	1240
		68.15	263.889	1573	1284
		68.2	263.889	1621	1305
		68.25	270.556	1625	1322
		68.3	277.222	1628	1377
		68.35	269.444	1643	1379
		68.4	290	1632	1353
		68.45	264.444	1625	1345
		68.5	288.889	1592	1278
		68.55	273.333	1682	1311
		68.6	263.889	1663	1392
		68.65	256.667	1628	1361
		68.7	261.111	1567	1325
		68.75	287.222	1649	1319
		68.8	256.111	1669	1354
		68.85	259.444	1606	1313
		68.9	269.444	1570	1395
		68.95	250.556	1581	1342
		69	267.222	1608	1430
		69.05	253.333	1602	1317
		69.1	237.778	1660	1338
		69.15	267.222	1612	1335
		69.2	282.778	1689	1425
		69.25	286.667	1633	1331
		69.3	248.889	1626	1325
		69.35	272.222	1615	1299
		69.4	247.222	1589	1370
		69.45	260.556	1616	1343
		69.5	292.222	1550	1314
		69.55	265	1560	1371
		69.6	266.111	1625	1287
		69.65	250	1649	1312
		69.7	251.111	1674	1319
		69.75	268.333	1658	1354
		69.8	246.667	1722	1330
		69.85	238.889	1622	1321
		69.9	268.889	1691	1365
		69.95	256.667	1598	1309
		70	279.444	1665	1412
		70.05	291.111	1630	1378
		70.1	261.111	1675	1380
		70.15	246.111	1570	1311
		70.2	270	1673	1320
		70.25	260.556	1610	1300
		70.3	245	1655	1332
		70.35	271.111	1610	1359
		70.4	277.778	1661	1318
		70.45	281.667	1606	1313
		70.5	271.111	1635	1333
		70.55	289.444	1622	1360
		70.6	272.778	1625	1316
		70.65	292.778	1629	1321
		70.7	275.556	1681	1301
		70.75	257.778	1602	1388
		70.8	296.111	1565	1339
		70.85	267.222	1635	1353
		70.9	249.444	1640	1295
		70.95	273.889	1564	1303
		71	266.667	1739	1383
		71.05	259.444	1643	1300
		71.1	258.333	1629	1352
		71.15	264.444	1595	1401
		71.2	297.778	1603	1356
		71.25	274.444	1686	1331
		71.3	262.222	1532	1361
		71.35	271.667	1661	1304
		71.4	279.444	1562	1329
		71.45	268.333	1679	1364
		71.5	261.111	1599	1417
		71.55	276.667	1662	1316
		71.6	271.667	1572	1389
		71.65	253.889	1609	1355
		71.7	276.111	1609	1274
		71.75	268.333	1656	1334
		71.8	273.889	1654	1369
		71.85	269.444	1611	1387
		71.9	268.889	1673	1291
		71.95	272.778	1602	1339
		72	287.778	1619	1406
		72.05	268.889	1631	1292
		72.1	258.889	1723	1372
		72.15	270	1746	1322
		72.2	283.889	1651	1314
		72.25	291.111	1607	1359
		72.3	272.778	1602	1352
		72.35	257.222	1589	1369
		72.4	264.444	1637	1369
		72.45	292.778	1763	1324
		72.5	262.778	1591	1300
		72.55	286.667	1673	1378
		72.6	298.889	1716	1304
		72.65	285	1608	1313
		72.7	262.778	1704	1366
		72.75	284.444	1640	1391
		72.8	251.667	1591	1365
		72.85	265.556	1583	1372
		72.9	293.889	1627	1292
		72.95	264.444	1673	1283
		73	281.667	1620	1391
		73.05	293.889	1641	1364
		73.1	257.222	1578	1329
		73.15	280.556	1683	1363
		73.2	279.444	1664	1332
		73.25	253.333	1607	1366
		73.3	275	1637	1387
		73.35	277.778	1657	1385
		73.4	285	1605	1352
		73.45	288.889	1654	1403
		73.5	282.778	1667	1366
		73.55	280.556	1655	1320
		73.6	257.222	1647	1410
		73.65	298.333	1684	1344
		73.7	272.778	1654	1272
		73.75	271.111	1692	1361
		73.8	277.222	1601	1328
		73.85	282.778	1658	1363
		73.9	286.667	1715	1337
		73.95	270	1635	1353
		74	275.556	1596	1306
		74.05	287.222	1639	1357
		74.1	278.333	1636	1359
		74.15	254.444	1701	1398
		74.2	273.333	1699	1312
		74.25	295.556	1618	1318
		74.3	270.556	1699	1347
		74.35	285	1596	1348
		74.4	276.111	1602	1380
		74.45	236.667	1652	1326
		74.5	261.667	1657	1313
		74.55	275	1596	1313
		74.6	265	1635	1313
		74.65	276.667	1638	1359
		74.7	276.111	1639	1296
		74.75	282.222	1630	1332
		74.8	283.889	1581	1343
		74.85	280	1582	1328
		74.9	285.556	1708	1301
		74.95	263.333	1648	1377
		75	265.556	1659	1339
		75.05	267.222	1633	1373
		75.1	270.556	1560	1393
		75.15	256.667	1568	1326
		75.2	265	1616	1352
		75.25	262.778	1617	1345
		75.3	289.444	1666	1363
		75.35	291.667	1653	1383
		75.4	272.222	1670	1402
		75.45	256.111	1605	1300
		75.5	290.556	1653	1418
		75.55	276.667	1523	1350
		75.6	289.444	1697	1363
		75.65	266.111	1631	1325
		75.7	300	1679	1353
		75.75	272.222	1700	1367
		75.8	264.444	1673	1325
		75.85	276.111	1628	1360
		75.9	265.556	1695	1242
		75.95	267.778	1663	1408
		76	277.222	1645	1394
		76.05	306.111	1641	1333
		76.1	283.889	1604	1319
		76.15	270	1683	1308
		76.2	271.111	1667	1314
		76.25	282.778	1667	1352
		76.3	291.111	1593	1361
		76.35	266.667	1643	1358
		76.4	265	1594	1337
		76.45	306.667	1595	1400
		76.5	291.667	1579	1396
		76.55	276.111	1667	1346
		76.6	284.444	1586	1352
		76.65	306.111	1478	1344
		76.7	282.778	1653	1406
		76.75	268.333	1631	1375
		76.8	286.667	1744	1421
		76.85	279.444	1604	1374
		76.9	267.222	1597	1399
		76.95	280.556	1687	1343
		77	267.222	1700	1366
		77.05	292.222	1597	1391
		77.1	282.778	1680	1367
		77.15	281.667	1654	1392
		77.2	275	1612	1372
		77.25	277.222	1595	1373
		77.3	276.667	1659	1388
		77.35	292.222	1611	1375
		77.4	284.444	1674	1396
		77.45	282.778	1727	1388
		77.5	290.556	1677	1313
		77.55	291.111	1638	1396
		77.6	275	1711	1335
		77.65	293.889	1663	1469
		77.7	303.333	1667	1339
		77.75	274.444	1651	1384
		77.8	292.222	1685	1377
		77.85	290	1678	1373
		77.9	301.111	1697	1306
		77.95	276.667	1708	1344
		78	308.889	1705	1425
		78.05	255	1660	1401
		78.1	306.111	1707	1385
		78.15	271.111	1694	1397
		78.2	317.222	1607	1347
		78.25	271.111	1668	1313
		78.3	267.778	1639	1381
		78.35	289.444	1601	1329
		78.4	306.667	1625	1420
		78.45	292.778	1648	1366
		78.5	282.778	1644	1397
		78.55	296.667	1608	1333
		78.6	300.556	1667	1328
		78.65	262.778	1663	1360
		78.7	274.444	1682	1380
		78.75	300	1617	1427
		78.8	299.444	1692	1386
		78.85	289.444	1656	1363
			291.667	1587	1419
		78.95	297.778	1676	1311
		79	270	1589	1402
		79.05	275	1560	1369
		79.1	293.889	1743	1300
		79.15	288.333	1684	1334
		79.2	263.889	1625	1341
		79.25	291.111	1622	1377
		79.3	283.889	1668	1383
		79.35	290.556	1749	1345
		79.4	266.111	1578	1346
		79.45	261.667	1635	1355
		79.5	281.111	1692	1403
		79.55	286.111	1699	1348
		79.6	300	1656	1401
		79.65	296.667	1569	1316
		79.7	282.778	1695	1311
		79.75	270	1687	1395
		79.8	268.333	1607	1305
		79.85	276.667	1589	1331
		79.9	271.667	1645	1354
		79.95	303.333	1629	1352
		80	286.667	1651	1301
